# Supplementary material for: Tonsillar cytotoxic CD4 T cells are involved in the control of EBV primary infection in children
Source: PubMed Central journal article supplement (PMC10810912; doi:10.1038/s41598-024-52666-4), 2024-01-25
Supplement: 41598_2024_52666_MOESM1_ESM.pdf [file 41598_2024_52666_MOESM1_ESM.pdf]

**Tonsillar cytotoxic CD4 T cells are involved in the control of EBV primary infection in children**

María Eugenia Amarillo, Agustina Moyano, Natalia Ferressini Gerpe, Elena De Matteo, Maria Victoria Preciado, Paola Chabay.

| Infection status by EBV | VCA IgM | VCA IgG<br>1/10. 1/40.<br>1/320 | EA IgG | EBNA1 IgG |
|-------------------------|---------|---------------------------------|--------|-----------|
| Primary infection       | +       | +/-                             | +/-    | -         |
| Healthy carrier         | -       | +                               | -      | +         |
| Reactivation            | -/+     | +                               | +      | +         |
| Non-infected            | -       | -                               | -      | -         |

Supplementary table S1. Infection status by EBV serological profile.

| Latency profiles | Viral antigen expression |
|------------------|--------------------------|
| 0                | -                        |
| I                | EBERs                    |
| II               | LMP1. EBERs              |
| III              | EBNA2. EBERs.<br>LMP1    |

Supplementary table S2. Latency profile by EBV protein expression

| Infection status by EBV | Median age (range) |
|-------------------------|--------------------|
| Primary infection       | 5 (2-12)           |
| Healthy carrier         | 6 (2-15)           |
| Reactivation            | 5 (2-11)           |
| Non-infected            | 2 (1-11)           |

Supplementary table S3. Age distribution of EBV infection status

| Infection status by EBV | N  | CD4/mm <sup>2</sup> median (IQ range) |                      |                        | Foxp3/mm <sup>2</sup> median (IQ range) |                        |                        | GZMB/mm <sup>2</sup> median (IQ range) |                        |                        | CD4-Foxp3/mm <sup>2</sup> median (IQ range) |                        |                        | CD4-GZMB/mm <sup>2</sup> median (IQ range) |                        |                        |
|-------------------------|----|---------------------------------------|----------------------|------------------------|-----------------------------------------|------------------------|------------------------|----------------------------------------|------------------------|------------------------|---------------------------------------------|------------------------|------------------------|--------------------------------------------|------------------------|------------------------|
|                         |    | GC                                    | IF                   | Total                  | GC                                      | IF                     | Total                  | GC                                     | IF                     | Total                  | GC                                          | IF                     | Total                  | GC                                         | IF                     | Total                  |
| Primary infection       | 16 | 3063<br>(2253-3451)                   | 8232<br>(6911-10150) | 11129<br>(9791-13634)  | 58.70<br>(13.81-117.4)                  | 752.7<br>(421.3-875.6) | 808.0<br>(497.2-973.7) | 145.0<br>(79.93-191.6)                 | 542.1<br>(429.9-725.1) | 721.7<br>(540.4-851.1) | 51.79<br>(13.81-62.15)                      | 721.7<br>(440.2-820.1) | 759.6<br>(433.3-871.9) | 14.50<br>(13.81-34.53)                     | 217.5<br>(153.7-281.4) | 234.8<br>(183.0-291.1) |
| Healthy carrier         | 21 | 2866<br>(2431-3992)                   | 8591<br>(6985-9865)  | 11325<br>(10317-13228) | 48.34<br>(20.72-107.0)                  | 669.9<br>(576.6-1091)  | 863.2<br>(645.7-1205)  | 110.5<br>(54.56-200.3)                 | 435.1<br>(313.9-580.1) | 550.4<br>(424.7-688.5) | 44.89<br>(20.72-62.15)                      | 669.9<br>(531.7-1036)  | 787.3<br>(604.3-1088)  | 27.62<br>(13.81-44.89)                     | 145.0<br>(103.2-193.4) | 179.5<br>(128.1-218.2) |
| Reactivation            | 9  | 2592<br>(2565-3384)                   | 8100<br>(6426-8739)  | 10642<br>(9202-12161)  | 34.53<br>(20.72-46.61)                  | 442.0<br>(379.8-932.3) | 469.6<br>(410.9-1087)  | 124.3<br>(100.1-172.6)                 | 429.5<br>(317.7-628.4) | 649.1<br>(419.2-812.1) | 41.43<br>(17.26-51.79)                      | 435.1<br>(379.8-894.3) | 469.6<br>(407.4-949.5) | 27.62<br>(17.75-48.34)                     | 186.5<br>(158.8-224.4) | 193.4<br>(180.0-265.9) |
| Non-infected            | 4  | 3391<br>(3128-4161)                   | 7571<br>(6507-10734) | 11535<br>(9922-14035)  | 31.08<br>(12.09-39.71)                  | 455.4<br>(367.7-502.2) | 489.9<br>(383.3-535.0) | 55.25<br>(19.51-65.60)                 | 300.4<br>(253.8-590.4) | 362.6<br>(276.7-645.7) | 31.08<br>(12.09-39.71)                      | 455.4<br>(367.7-502.2) | 489.9<br>(383.3-535.0) | 10.36<br>(0.000-25.90)                     | 176.1<br>(94.95-329.7) | 189.9<br>(94.95-352.2) |

Supplementary table S4. Median and Interquartile (IQ) range according to EBV infection status. GC: germinal center; IF: interfollicular region.

| EBV Latency profile | N  | CD4/mm <sup>2</sup> median (IQ range) |                      |                        | Foxp3/mm <sup>2</sup> median (IQ range) |                        |                        | GZMB/mm <sup>2</sup> median (IQ range) |                        |                        | CD4-Foxp3/mm <sup>2</sup> median (IQ range) |                        |                        | CD4-GZMB/mm <sup>2</sup> median (IQ range) |                        |                        |
|---------------------|----|---------------------------------------|----------------------|------------------------|-----------------------------------------|------------------------|------------------------|----------------------------------------|------------------------|------------------------|---------------------------------------------|------------------------|------------------------|--------------------------------------------|------------------------|------------------------|
|                     |    | GC                                    | IF                   | Total                  | GC                                      | IF                     | Total                  | GC                                     | IF                     | Total                  | GC                                          | IF                     | Total                  | GC                                         | IF                     | Total                  |
| 0                   | 7  | 2728<br>(2445-3529)                   | 9316<br>(8826-10241) | 12707<br>(11760-13729) | 48.34<br>(20.72-103.6)                  | 966.8<br>(738.9-1084)  | 987.5<br>(787.2-1146)  | 78.73<br>(41.43-207.2)                 | 448.9<br>(400.5-614.6) | 566.3<br>(435.1-711.3) | 48.34<br>(20.72-103.6)                      | 745.8<br>(656.0-1036)  | 870.1<br>(704.4-1095)  | 13.81<br>(6.906-48.34)                     | 158.8<br>(124.3-207.2) | 186.5<br>(131.2-221.0) |
| I                   | 12 | 2679<br>(2327-3190)                   | 8100<br>(7921-10676) | 10642<br>(10324-14509) | 55.25<br>(34.53-96.68)                  | 875.6<br>(607.7-1153)  | 972.3<br>(628.4-1264)  | 186.5<br>(118.8-226.2)                 | 488.2<br>(367.2-623.2) | 657.4<br>(500.8-839.0) | 55.25<br>(27.62-89.77)                      | 794.2<br>(524.8-1057)  | 864.6<br>(545.6-1119)  | 34.53<br>(27.62-34.53)                     | 181.3<br>(116.5-240.0) | 221.7<br>(148.5-269.3) |
| II                  | 14 | 2842<br>(2374-3373)                   | 7804<br>(6075-9483)  | 10977<br>(8772-12507)  | 48.34<br>(13.81-75.96)                  | 587.4<br>(366.0-820.1) | 794.2<br>(386.7-904.7) | 113.9<br>(65.60-202.0)                 | 504.1<br>(324.6-711.3) | 656.0<br>(481.7-799.3) | 43.85<br>(20.72-54.38)                      | 483.4<br>(352.2-783.8) | 787.3<br>(386.7-866.7) | 17.95<br>(13.81-50.07)                     | 217.5<br>(150.2-293.5) | 249.0<br>(177.8-311.8) |
| III                 | 13 | 3232<br>(2439-3719)                   | 7603<br>(6056-8649)  | 10534<br>(9029-12403)  | 41.43<br>(13.81-200.3)                  | 607.7<br>(366.0-766.5) | 663.0<br>(379.8-991.0) | 107.0<br>(86.32-136.4)                 | 442.0<br>(265.9-663.0) | 550.4<br>(386.7-787.3) | 41.43<br>(10.36-55.25)                      | 607.7<br>(366.0-759.6) | 663.0<br>(376.4-814.9) | 20.72<br>(10.36-87.62)                     | 158.8<br>(91.50-183)   | 184.0<br>(102.4-208.9) |

Supplementary table S5. Median and Interquartile (IQ) range according to latency profiles. GC: germinal center; IF: interfollicular region.

| BMRF1 expression | N  | CD4/mm <sup>2</sup> median (IQ range) |                     |                       | Foxp3/mm <sup>2</sup> median (IQ range) |                        |                       | GZMB/mm <sup>2</sup> median (IQ range) |                        |                        | CD4-Foxp3/mm <sup>2</sup> median (IQ range) |                        |                        | CD4-GZMB/mm <sup>2</sup> median (IQ range) |                        |                        |
|------------------|----|---------------------------------------|---------------------|-----------------------|-----------------------------------------|------------------------|-----------------------|----------------------------------------|------------------------|------------------------|---------------------------------------------|------------------------|------------------------|--------------------------------------------|------------------------|------------------------|
|                  |    | GC                                    | IF                  | Total                 | GC                                      | IF                     | Total                 | GC                                     | IF                     | Total                  | GC                                          | IF                     | Total                  | GC                                         | IF                     | Total                  |
| BMRF1+           | 10 | 3049<br>(2466-3617)                   | 7728<br>(6424-8836) | 10612<br>(9654-11483) | 48.34<br>(17.26-145.0)                  | 642.2<br>(417.8-915.0) | 745.8<br>(424.7-1042) | 96.68<br>(65.60-134.7)                 | 421.3<br>(272.8-490.3) | 490.3<br>(386.7-574.9) | 41.43<br>(13.81-55.25)                      | 635.3<br>(412.6-911.6) | 742.4<br>(419.5-961.6) | 20.72<br>(13.81-27.62)                     | 165.7<br>(155.4-202.0) | 189.9<br>(177.8-215.8) |
| BMRF1-           | 40 | 3004<br>(2445-3487)                   | 8524<br>(6733-9875) | 11506<br>(9951-13231) | 44.89<br>(20.72-96.68)                  | 635.3<br>(421.3-918.5) | 752.7<br>(459.2-1126) | 113.9<br>(69.06-191.6)                 | 455.8<br>(333.0-664.7) | 625.0<br>(457.0-787.3) | 41.43<br>(20.72-56.97)                      | 621.5<br>(414.3-870.1) | 687.1<br>(459.2-935.7) | 27.62<br>(13.81-41.43)                     | 177.8<br>(124.3-252.1) | 210.6<br>(138.1-279.7) |

Supplementary table S6. Median and Interquartile (IQ) range according to BMRF1 expression. GC: germinal center; IF: interfollicular region.

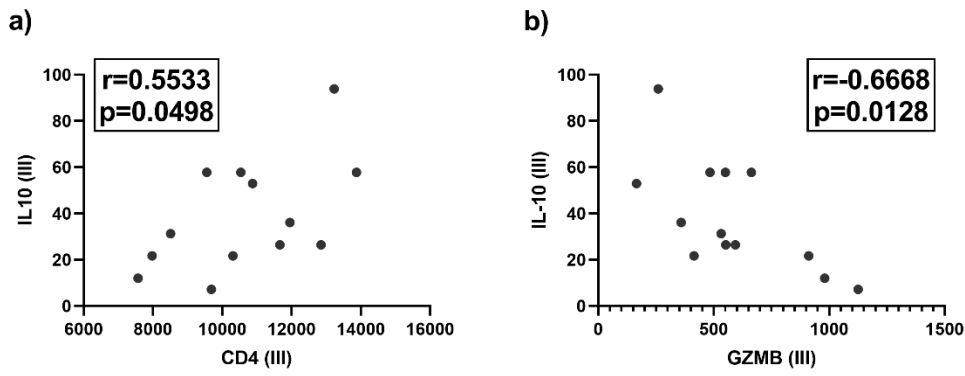

Supplementary figure 1. Correlation of IL-10+ cells with CD4 (a) and GZMB (b) in latency III.

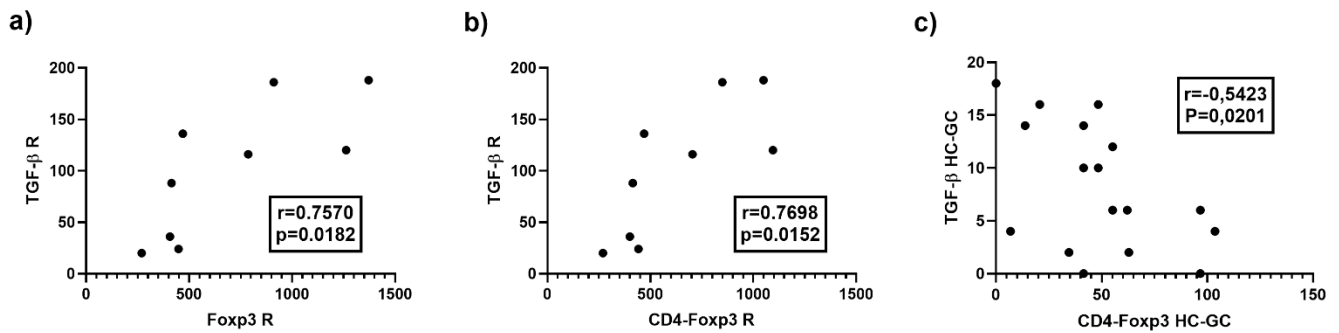

Supplementary figure 2. Correlation of TGF $\beta$ + cells with Foxp3 (a) and CD4-Foxp3 (b) in reactivation, and with CD4-Foxp3 at the GC (c).

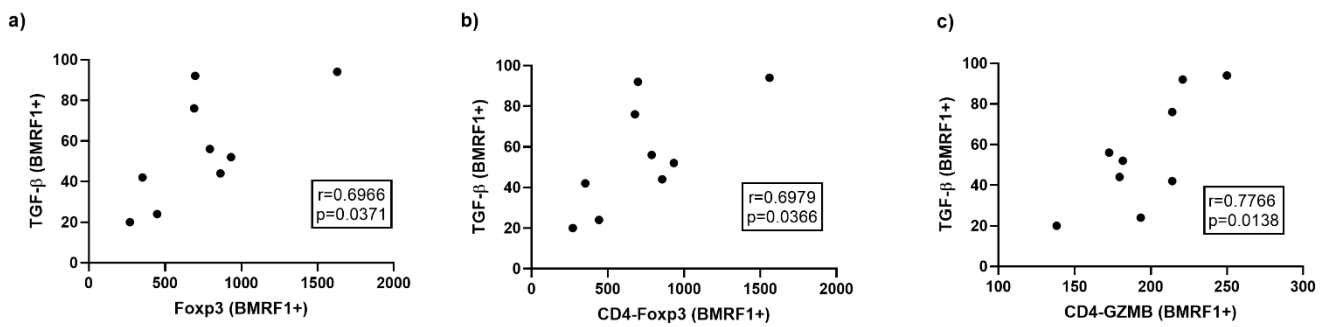

Supplementary figure 3. Correlation of TGF $\beta$ + cells with Foxp3 (a), CD4-Foxp3 (b) and with CD4-GZMB (c) in BMRF1+ cases.
